# Supplementary material for: Long-term impact of manuring on soil organic matter quality indicators under field cropping systems
Source: Frontiers journal article supplement (doi:10.3389/fenvs.2023.1116930), 2023-05-12
Supplement: Data_Sheet_1.docx [file Data_Sheet_1.docx]

**Supplementary Material**


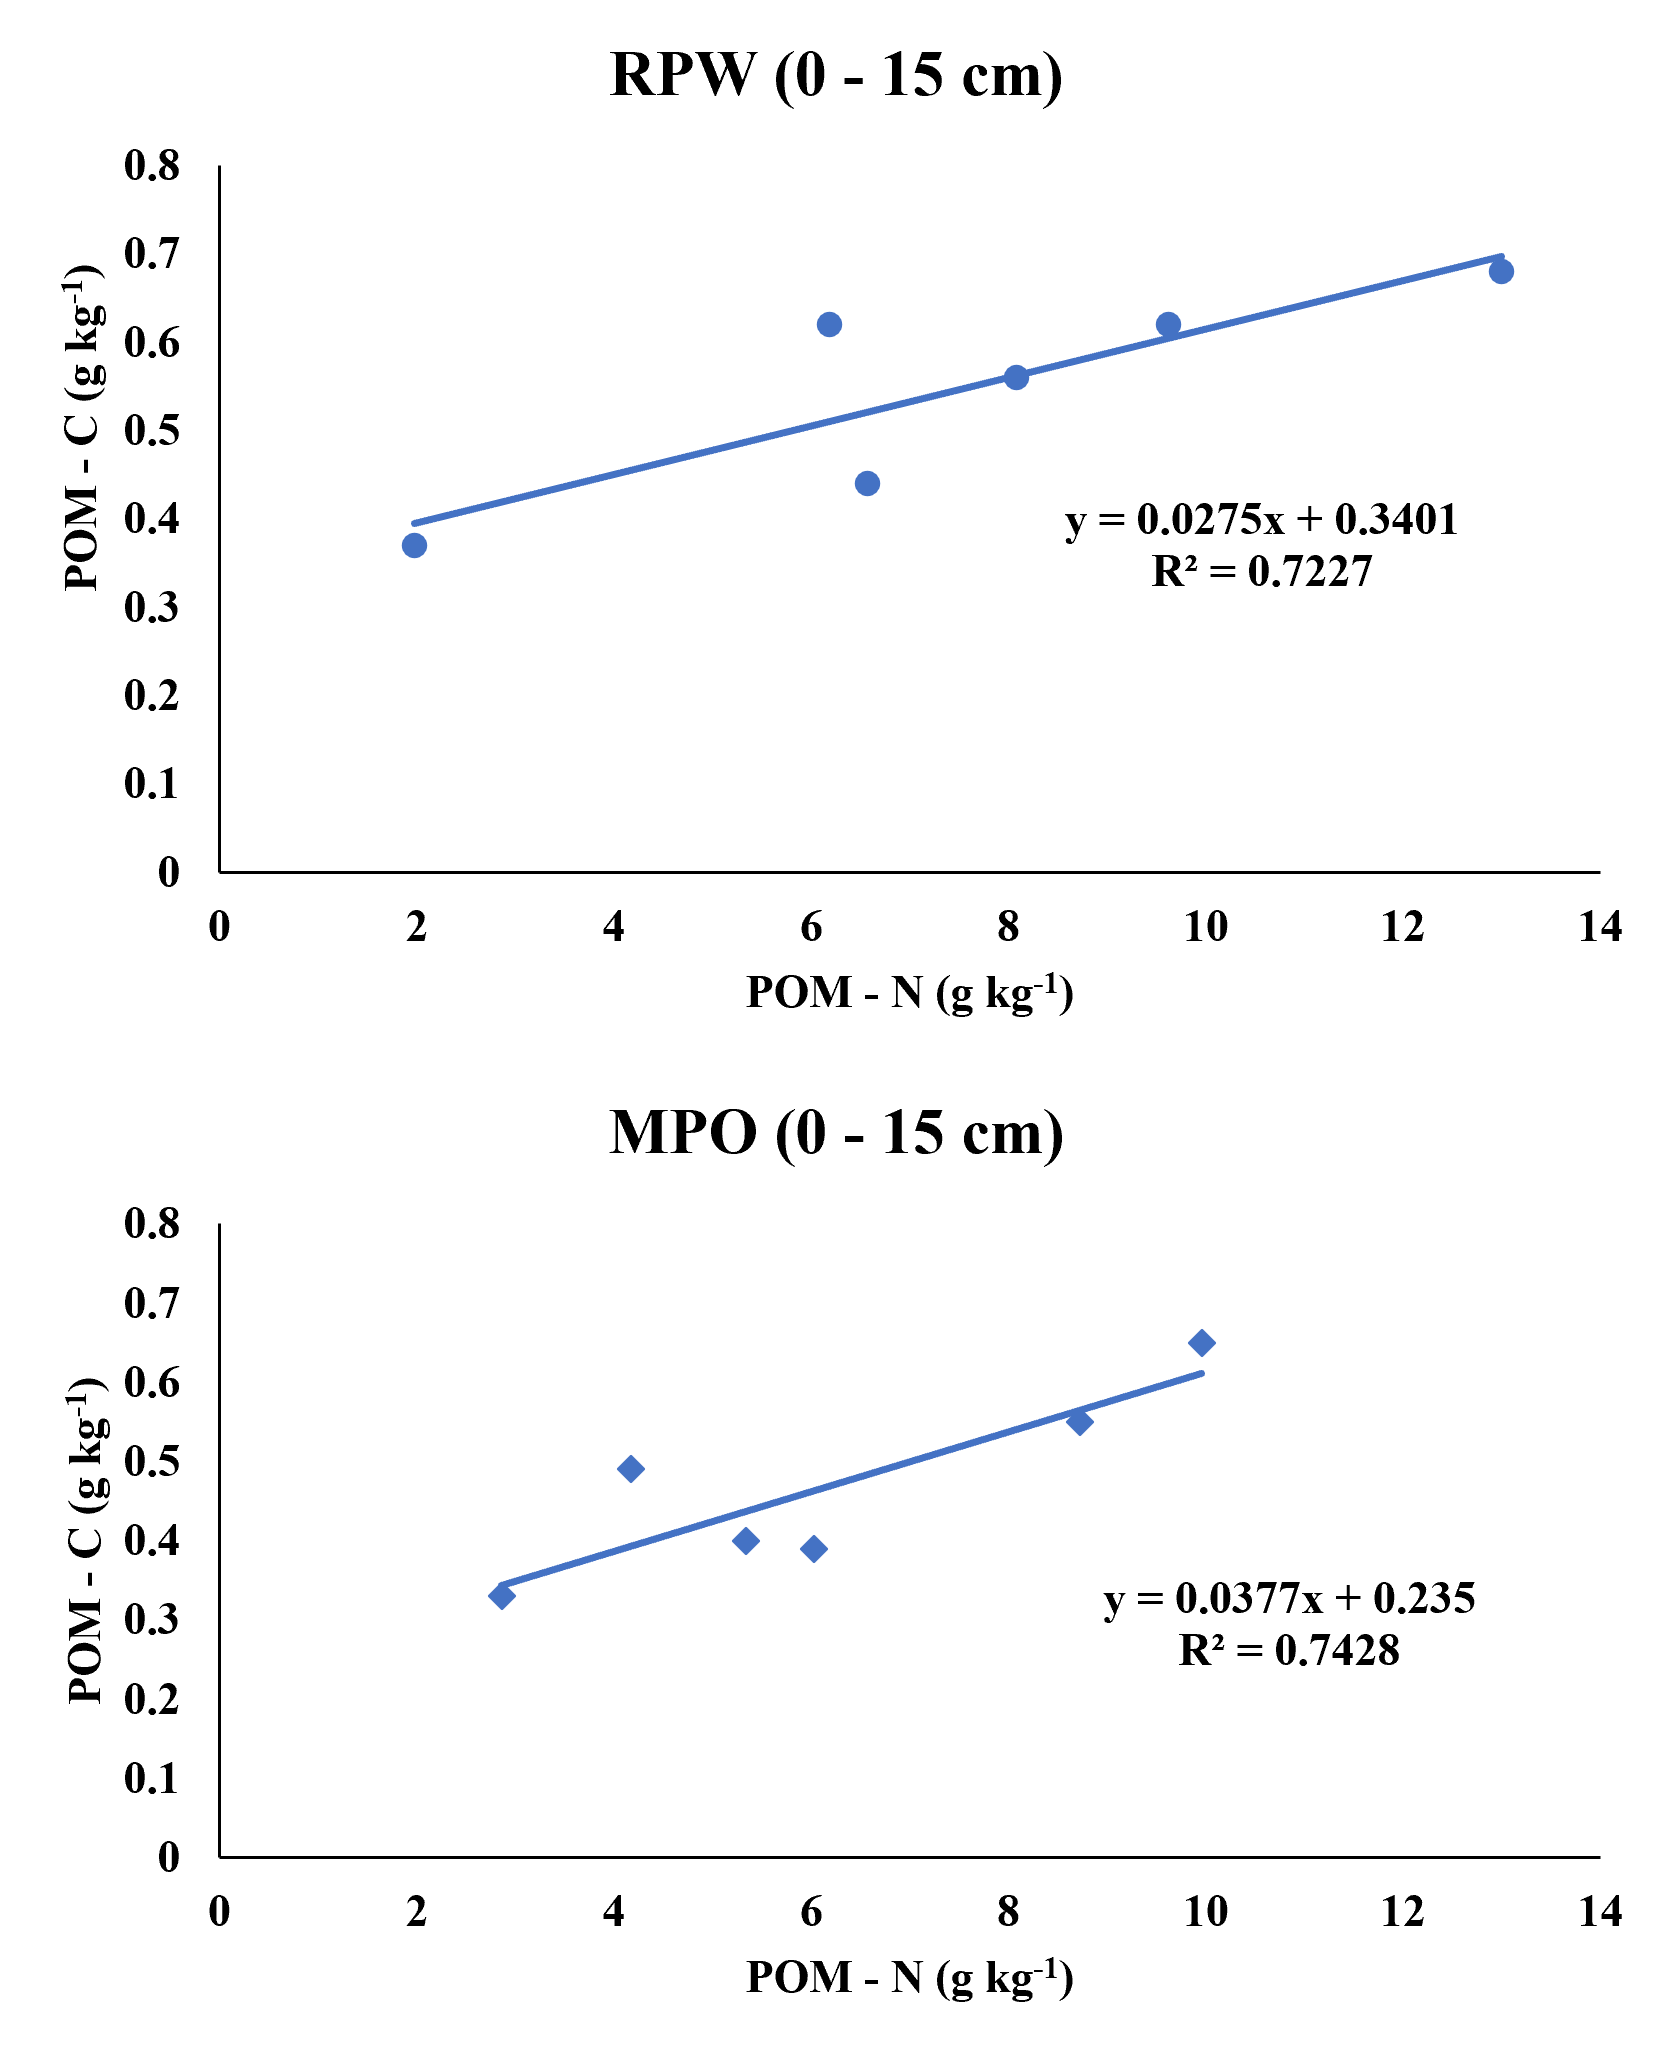


**Figure S1.** Correlation of POMC and POMN in top soil (0-15 cm) under rice-potato-wheat (RPW) and maize-potato-onion (MPO) cropping systems

**Note:** POM-C: Particulate Organic Matter Carbon; POM-N: Particulate Organic Matter Nitrogen
